# Supplementary material for: Planning human resources and facilities to achieve Sustainable Development Goals: a decision-analytical modelling approach to predict cancer control requirements in Indonesia
Source: HighWire-hosted journal article supplement (doi:10.1136/bmjopen-2021-059555), 2022-05-01
Supplement: bmjopen-2021-059555supp001_data_supplement.pdf [file bmjopen-2021-059555supp001_data_supplement.pdf]

## Appendix 1. Categorisation of Healthcare Facilities Related Oncology in Indonesia

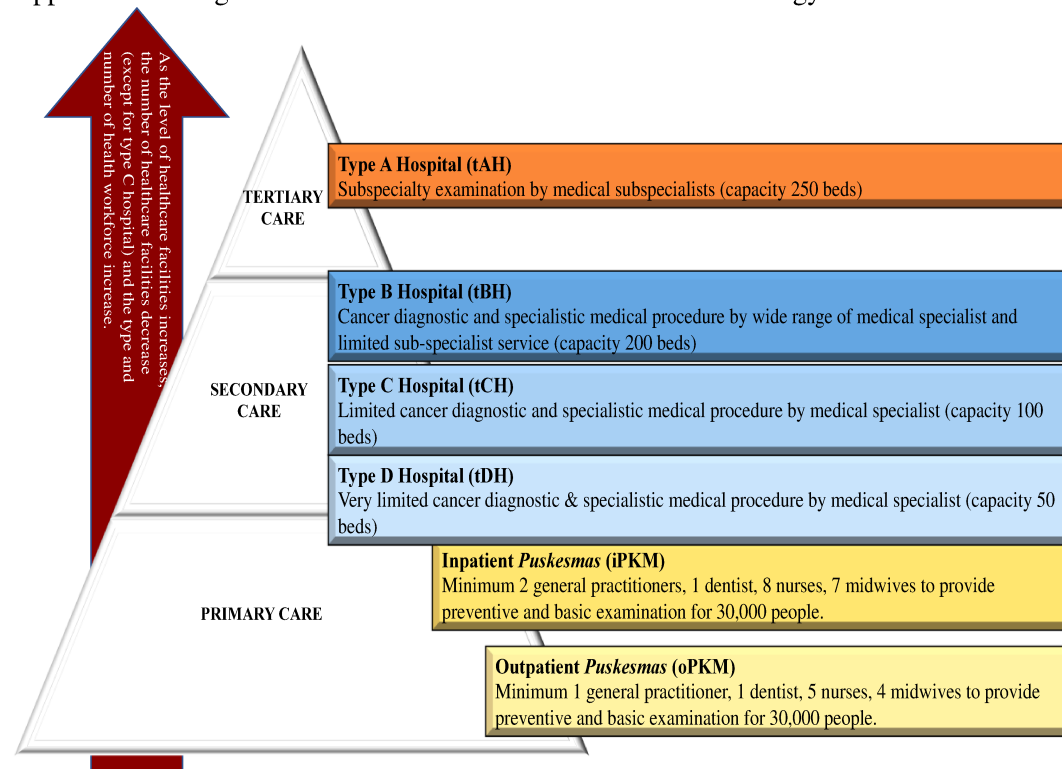

Source: Adapted from NCCC (2015)

## Appendix 2. Staffing Standard in Indonesia

| STAFF                             | oPKM | iPKM | tDH | tCH | tBH | tAH | Source     |
|-----------------------------------|------|------|-----|-----|-----|-----|------------|
| General Practitioner              | 1    | 2    | 4   | 6   | 10  | 12  | MoH, 2019  |
| Nurse                             | 5    | 8    | 33  | 67  | 200 | 250 | MoH, 2019  |
| Paediatrician                     | 0    | 0    | 1   | 2   | 4   | 4   | MoH, 2019  |
| Obstetrician and<br>Gynaecologist | 0    | 0    | 1   | 2   | 4   | 4   | MoH, 2019  |
| Internist                         | 0    | 0    | 1   | 2   | 4   | 4   | MoH, 2019  |
| General Surgeon                   | 0    | 0    | 1   | 2   | 4   | 4   | MoH, 2019  |
| Pulmonologist                     | 0    | 0    | 0   | 1   | 2   | 3   | MoH, 2019  |
| Radiologist                       | 0    | 0    | 1   | 1   | 2   | 3   | MoH, 2019  |
| Clinical Pathologist              | 0    | 0    | 1   | 1   | 2   | 3   | MoH, 2019  |
| Anatomical Pathologist            | 0    | 0    | 1   | 1   | 1   | 2   | MoH, 2019  |
| Surgical Oncologist               | 0    | 0    | 0   | 0   | 1   | 2   | NCCC, 2015 |
| Medical Oncologist                | 0    | 0    | 0   | 0   | 1   | 1   | NCCC, 2015 |
| Paediatric Medical<br>Oncologist  | 0    | 0    | 0   | 0   | 1   | 1   | NCCC, 2015 |
| Gynecologic Oncologist            | 0    | 0    | 0   | 0   | 1   | 2   | NCCC, 2015 |
| ENT Oncologist                    | 0    | 0    | 0   | 0   | 1   | 1   | NCCC, 2015 |
| Urologic Oncologist               | 0    | 0    | 0   | 0   | 1   | 1   | NCCC, 2015 |
| Pulmonary Oncologist              | 0    | 0    | 0   | 0   | 1   | 1   | NCCC, 2015 |
| Radiation Oncologist              | 0    | 0    | 0   | 0   | 1   | 1   | NCCC, 2015 |
| Medical Physicist                 | 0    | 0    | 0   | 0   | 1   | 1   | NCCC, 2015 |
| Radiation Therapy<br>Technologist | 0    | 0    | 0   | 0   | 1   | 1   | NCCC, 2015 |

Appendix 3. Estimates of the required HRH were then the results of the calculated staffing levels and the total number of each type of healthcare facilities in a certain year as projected using the predictive model, using the following formula:

$$HRH_{r,xy} = \sum [(oPKM_{xy} * SSr_{oPKM}) + (iPKM_{xy} * SSr_{iPKM}) + (tDH_{xy} * SSr_{tDH}) + (tCH_{xy} * SSr_{tCH}) + (tBH_{xy} * SSr_{tBH}) + (tAH_{xy} * SSr_{tAH})]$$

Where:

**HRH<sub>r,xy</sub>** represents the total HRH requirements for a particular type of staff **r**, in particular region **x**, in year **y**.

**oPKM<sub>xy</sub>** represents total number of oPKM in region **x** in year **y**.

**SSr<sub>oPKM</sub>** represents the staffing standard for staff type **r** at oPKM level.

Similar notations were applied to other type of healthcare facilities.

## Appendix 4. Forecast of Healthcare Facilities and HRH-related Oncology in the Sumatera Region

| REGION 1 - SUMATERA ISLAND                              |              |              |              |              |              |              |              |              |               |               |               |               |
|---------------------------------------------------------|--------------|--------------|--------------|--------------|--------------|--------------|--------------|--------------|---------------|---------------|---------------|---------------|
| Projected Population                                    | 58,560,200   | 59,337,100   | 60,093,700   | 60,828,500   | 61,541,100   | 62,231,100   | 62,898,600   | 63,545,500   | 64,173,300    | 64,781,300    | 65,369,500    | 65,938,300    |
| HEALTH FACILITY/YEAR                                    | 2019         | 2020         | 2021         | 2022         | 2023         | 2024         | 2025         | 2026         | 2027          | 2028          | 2029          | 2030          |
| Outpatient Puskesmas                                    | 997          | 916          | 845          | 783          | 728          | 680          | 637          | 600          | 567           | 538           | 513           | 491           |
| Inpatient Puskesmas                                     | 1651         | 1948         | 2226         | 2487         | 2732         | 2963         | 3181         | 3388         | 3583          | 3768          | 3945          | 4112          |
| Type D Hospital                                         | 210          | 268          | 318          | 362          | 401          | 436          | 468          | 497          | 524           | 549           | 572           | 594           |
| Type C Hospital                                         | 419          | 524          | 644          | 779          | 925          | 1082         | 1248         | 1422         | 1603          | 1791          | 1985          | 2184          |
| Type B Hospital                                         | 82           | 88           | 94           | 101          | 110          | 119          | 129          | 140          | 153           | 167           | 182           | 198           |
| Type A Hospital                                         | 10           | 11           | 13           | 14           | 15           | 17           | 18           | 20           | 22            | 24            | 26            | 29            |
| <b>Total Health Facilities</b>                          | <b>3370</b>  | <b>3755</b>  | <b>4141</b>  | <b>4526</b>  | <b>4911</b>  | <b>5296</b>  | <b>5682</b>  | <b>6067</b>  | <b>6452</b>   | <b>6837</b>   | <b>7223</b>   | <b>7608</b>   |
| <b>Overall Health facilities per 100,000 population</b> | <b>5.755</b> | <b>6.329</b> | <b>6.890</b> | <b>7.440</b> | <b>7.980</b> | <b>8.511</b> | <b>9.033</b> | <b>9.547</b> | <b>10.054</b> | <b>10.554</b> | <b>11.049</b> | <b>11.538</b> |
| <b>Primary care (Puskesmas) per 30,000 populati</b>     | <b>1.357</b> | <b>1.448</b> | <b>1.533</b> | <b>1.613</b> | <b>1.687</b> | <b>1.756</b> | <b>1.821</b> | <b>1.883</b> | <b>1.940</b>  | <b>1.994</b>  | <b>2.046</b>  | <b>2.094</b>  |
| <b>Secondary care per 100,000 population</b>            | <b>1.215</b> | <b>1.482</b> | <b>1.758</b> | <b>2.042</b> | <b>2.333</b> | <b>2.630</b> | <b>2.933</b> | <b>3.240</b> | <b>3.553</b>  | <b>3.869</b>  | <b>4.190</b>  | <b>4.514</b>  |
| Type D hospital per 100,000 population                  | 0.359        | 0.452        | 0.530        | 0.595        | 0.652        | 0.701        | 0.744        | 0.782        | 0.816         | 0.847         | 0.875         | 0.901         |
| Type C hospital per 100,000 population                  | 0.716        | 0.882        | 1.072        | 1.280        | 1.503        | 1.738        | 1.984        | 2.237        | 2.498         | 2.765         | 3.037         | 3.313         |
| Type B hospital per 100,000 population                  | 0.141        | 0.148        | 0.157        | 0.167        | 0.178        | 0.191        | 0.205        | 0.221        | 0.238         | 0.257         | 0.278         | 0.300         |
| <b>Tertiary care per 100,000 population</b>             | <b>0.018</b> | <b>0.019</b> | <b>0.021</b> | <b>0.023</b> | <b>0.025</b> | <b>0.027</b> | <b>0.029</b> | <b>0.031</b> | <b>0.034</b>  | <b>0.037</b>  | <b>0.040</b>  | <b>0.043</b>  |

  

| REGION 1 - SUMATERA ISLAND     |              |               |               |               |               |               |               |               |               |               |               |               |
|--------------------------------|--------------|---------------|---------------|---------------|---------------|---------------|---------------|---------------|---------------|---------------|---------------|---------------|
| STAFF TYPE                     | Year 2019    | Year 2020     | Year 2021     | Year 2022     | Year 2023     | Year 2024     | Year 2025     | Year 2026     | Year 2027     | Year 2028     | Year 2029     | Year 2030     |
| General Practitioner           | 8602         | 10042         | 11528         | 13057         | 14624         | 16228         | 17866         | 19537         | 21238         | 22970         | 24730         | 26518         |
| Nurse                          | 72254        | 84522         | 97685         | 111669        | 126415        | 141878        | 158020        | 174811        | 192226        | 210244        | 228847        | 248020        |
| Paediatrician                  | 1419         | 1712          | 2034          | 2380          | 2750          | 3141          | 3552          | 3982          | 4429          | 4893          | 5373          | 5868          |
| Obstetrician and Gynaecologist | 1419         | 1712          | 2034          | 2380          | 2750          | 3141          | 3552          | 3982          | 4429          | 4893          | 5373          | 5868          |
| Internist                      | 1419         | 1712          | 2034          | 2380          | 2750          | 3141          | 3552          | 3982          | 4429          | 4893          | 5373          | 5868          |
| General Surgeon                | 1419         | 1712          | 2034          | 2380          | 2750          | 3141          | 3552          | 3982          | 4429          | 4893          | 5373          | 5868          |
| Anesthesiologist               | 928          | 1112          | 1308          | 1514          | 1731          | 1957          | 2194          | 2439          | 2695          | 2959          | 3232          | 3515          |
| Radiologist                    | 825          | 1002          | 1189          | 1385          | 1591          | 1805          | 2028          | 2259          | 2498          | 2745          | 2999          | 3260          |
| Clinical Pathologist           | 825          | 1002          | 1189          | 1385          | 1591          | 1805          | 2028          | 2259          | 2498          | 2745          | 2999          | 3260          |
| Anatomical Pathologist         | 732          | 902           | 1082          | 1270          | 1466          | 1670          | 1881          | 2099          | 2324          | 2554          | 2791          | 3033          |
| Surgical Oncologist            | 103          | 111           | 119           | 129           | 140           | 152           | 165           | 180           | 196           | 214           | 234           | 255           |
| Medical Oncologist             | 93           | 99            | 107           | 115           | 125           | 135           | 147           | 160           | 175           | 190           | 208           | 226           |
| Paediatric Medical Oncologist  | 93           | 99            | 107           | 115           | 125           | 135           | 147           | 160           | 175           | 190           | 208           | 226           |
| Gynecologic Oncologist         | 103          | 111           | 119           | 129           | 140           | 152           | 165           | 180           | 196           | 214           | 234           | 255           |
| ENT Oncologist                 | 93           | 99            | 107           | 115           | 125           | 135           | 147           | 160           | 175           | 190           | 208           | 226           |
| Urologic Oncologist            | 93           | 99            | 107           | 115           | 125           | 135           | 147           | 160           | 175           | 190           | 208           | 226           |
| Pulmonologic Oncologist        | 93           | 99            | 107           | 115           | 125           | 135           | 147           | 160           | 175           | 190           | 208           | 226           |
| Radiation Oncologist           | 93           | 99            | 107           | 115           | 125           | 135           | 147           | 160           | 175           | 190           | 208           | 226           |
| Medical Physicist              | 93           | 99            | 107           | 115           | 125           | 135           | 147           | 160           | 175           | 190           | 208           | 226           |
| Radiation Therapy Technologist | 93           | 99            | 107           | 115           | 125           | 135           | 147           | 160           | 175           | 190           | 208           | 226           |
| <b>TOTAL</b>                   | <b>90788</b> | <b>106448</b> | <b>123209</b> | <b>140982</b> | <b>159696</b> | <b>179294</b> | <b>199732</b> | <b>220973</b> | <b>242984</b> | <b>265741</b> | <b>289220</b> | <b>313401</b> |

## Appendix 5. Forecast of Healthcare Facilities and HRH-related Oncology in the Java Region

| REGION 2 - JAVA ISLAND                                  |              |              |              |              |              |              |              |              |              |              |              |              |
|---------------------------------------------------------|--------------|--------------|--------------|--------------|--------------|--------------|--------------|--------------|--------------|--------------|--------------|--------------|
| Projected Population                                    | 151,061,800  | 152,449,900  | 153,797,800  | 155,101,700  | 156,361,000  | 157,573,300  | 158,738,000  | 159,852,700  | 160,912,700  | 161,917,500  | 162,864,900  | 163,754,800  |
| HEALTH FACILITY/YEAR                                    | 2019         | 2020         | 2021         | 2022         | 2023         | 2024         | 2025         | 2026         | 2027         | 2028         | 2029         | 2030         |
| Outpatient Puskesmas                                    | 1371         | 1222         | 1090         | 973          | 869          | 776          | 694          | 621          | 556          | 498          | 447          | 402          |
| Inpatient Puskesmas                                     | 2226         | 2604         | 2950         | 3265         | 3555         | 3820         | 4063         | 4287         | 4493         | 4683         | 4858         | 5020         |
| Type D Hospital                                         | 408          | 531          | 639          | 736          | 822          | 900          | 969          | 1032         | 1089         | 1141         | 1188         | 1231         |
| Type C Hospital                                         | 718          | 892          | 1090         | 1310         | 1545         | 1795         | 2055         | 2325         | 2601         | 2882         | 3167         | 3454         |
| Type B Hospital                                         | 271          | 313          | 362          | 418          | 481          | 551          | 630          | 717          | 812          | 917          | 1031         | 1154         |
| Type A Hospital                                         | 41           | 44           | 45           | 45           | 45           | 46           | 46           | 47           | 47           | 48           | 48           | 49           |
| <b>Total Health Facilities</b>                          | <b>5035</b>  | <b>5606</b>  | <b>6176</b>  | <b>6747</b>  | <b>7317</b>  | <b>7888</b>  | <b>8458</b>  | <b>9029</b>  | <b>9599</b>  | <b>10170</b> | <b>10740</b> | <b>11311</b> |
| <b>Overall Health facilities per 100,000 population</b> | <b>3.333</b> | <b>3.677</b> | <b>4.016</b> | <b>4.350</b> | <b>4.680</b> | <b>5.006</b> | <b>5.328</b> | <b>5.648</b> | <b>5.965</b> | <b>6.281</b> | <b>6.594</b> | <b>6.907</b> |
| <b>Primary care (Puskesmas) per 30,000 populati</b>     | <b>0.714</b> | <b>0.753</b> | <b>0.788</b> | <b>0.820</b> | <b>0.849</b> | <b>0.875</b> | <b>0.899</b> | <b>0.921</b> | <b>0.941</b> | <b>0.960</b> | <b>0.977</b> | <b>0.993</b> |
| <b>Secondary care per 100,000 population</b>            | <b>0.925</b> | <b>1.138</b> | <b>1.360</b> | <b>1.588</b> | <b>1.822</b> | <b>2.060</b> | <b>2.302</b> | <b>2.549</b> | <b>2.798</b> | <b>3.051</b> | <b>3.307</b> | <b>3.566</b> |
| Type D hospital per 100,000 population                  | 0.270        | 0.348        | 0.416        | 0.475        | 0.526        | 0.571        | 0.611        | 0.646        | 0.677        | 0.705        | 0.730        | 0.752        |
| Type C Hospital per 100,000 population                  | 0.475        | 0.585        | 0.709        | 0.844        | 0.988        | 1.139        | 1.295        | 1.454        | 1.616        | 1.780        | 1.944        | 2.109        |
| Type B hospital per 100,000 population                  | 0.180        | 0.205        | 0.235        | 0.269        | 0.307        | 0.350        | 0.397        | 0.448        | 0.505        | 0.567        | 0.633        | 0.705        |
| <b>Tertiary care per 100,000 population</b>             | <b>0.027</b> | <b>0.029</b> | <b>0.029</b> | <b>0.029</b> | <b>0.029</b> | <b>0.029</b> | <b>0.029</b> | <b>0.029</b> | <b>0.029</b> | <b>0.029</b> | <b>0.030</b> | <b>0.030</b> |

  

| REGION 2 - JAVA ISLAND         |               |               |               |               |               |               |               |               |               |               |               |               |
|--------------------------------|---------------|---------------|---------------|---------------|---------------|---------------|---------------|---------------|---------------|---------------|---------------|---------------|
| STAFF TYPE                     | Year 2019     | Year 2020     | Year 2021     | Year 2022     | Year 2023     | Year 2024     | Year 2025     | Year 2026     | Year 2027     | Year 2028     | Year 2029     | Year 2030     |
| General Practitioner           | 14969         | 17558         | 20242         | 23021         | 25890         | 28845         | 31883         | 35001         | 38196         | 41466         | 44807         | 48219         |
| Nurse                          | 150798        | 177743        | 206714        | 237783        | 270909        | 306055        | 343182        | 382253        | 423231        | 466080        | 510763        | 557243        |
| Paediatrician                  | 3094          | 3741          | 4446          | 5205          | 6017          | 6877          | 7784          | 8736          | 9730          | 10765         | 11839         | 12951         |
| Obstetrician and Gynaecologist | 3094          | 3741          | 4446          | 5205          | 6017          | 6877          | 7784          | 8736          | 9730          | 10765         | 11839         | 12951         |
| Internist                      | 3094          | 3741          | 4446          | 5205          | 6017          | 6877          | 7784          | 8736          | 9730          | 10765         | 11839         | 12951         |
| General Surgeon                | 3094          | 3741          | 4446          | 5205          | 6017          | 6877          | 7784          | 8736          | 9730          | 10765         | 11839         | 12951         |
| Anesthesiologist               | 2146          | 2581          | 3038          | 3523          | 4036          | 4577          | 5145          | 5741          | 6364          | 7013          | 7689          | 8391          |
| Radiologist                    | 1792          | 2180          | 2587          | 3016          | 3465          | 3934          | 4423          | 4931          | 5457          | 6001          | 6562          | 7140          |
| Clinical Pathologist           | 1792          | 2180          | 2587          | 3016          | 3465          | 3934          | 4423          | 4931          | 5457          | 6001          | 6562          | 7140          |
| Anatomical Pathologist         | 1479          | 1823          | 2181          | 2553          | 2939          | 3337          | 3747          | 4167          | 4597          | 5036          | 5483          | 5937          |
| Surgical Oncologist            | 354           | 401           | 451           | 508           | 571           | 643           | 722           | 810           | 907           | 1013          | 1127          | 1252          |
| Medical Oncologist             | 313           | 357           | 406           | 463           | 526           | 597           | 676           | 763           | 860           | 965           | 1079          | 1203          |
| Paediatric Medical Oncologist  | 313           | 357           | 406           | 463           | 526           | 597           | 676           | 763           | 860           | 965           | 1079          | 1203          |
| Gynecologic Oncologist         | 354           | 401           | 451           | 508           | 571           | 643           | 722           | 810           | 907           | 1013          | 1127          | 1252          |
| ENT Oncologist                 | 313           | 357           | 406           | 463           | 526           | 597           | 676           | 763           | 860           | 965           | 1079          | 1203          |
| Urologic Oncologist            | 313           | 357           | 406           | 463           | 526           | 597           | 676           | 763           | 860           | 965           | 1079          | 1203          |
| Pulmonologic Oncologist        | 313           | 357           | 406           | 463           | 526           | 597           | 676           | 763           | 860           | 965           | 1079          | 1203          |
| Radiation Oncologist           | 313           | 357           | 406           | 463           | 526           | 597           | 676           | 763           | 860           | 965           | 1079          | 1203          |
| Medical Physicist              | 313           | 357           | 406           | 463           | 526           | 597           | 676           | 763           | 860           | 965           | 1079          | 1203          |
| Radiation Therapy Technologist | 313           | 357           | 406           | 463           | 526           | 597           | 676           | 763           | 860           | 965           | 1079          | 1203          |
| <b>TOTAL</b>                   | <b>188560</b> | <b>222682</b> | <b>259286</b> | <b>298449</b> | <b>340120</b> | <b>384251</b> | <b>430791</b> | <b>479694</b> | <b>530913</b> | <b>584401</b> | <b>640112</b> | <b>698000</b> |

## Appendix 6. Forecast of Healthcare Facilities and HRH-related Oncology in the Bali and the Nusa Tenggara Region

| REGION 3 - BALI AND THE NUSA TENGGARA ISLANDS           |              |              |              |              |              |              |              |              |              |              |              |              |
|---------------------------------------------------------|--------------|--------------|--------------|--------------|--------------|--------------|--------------|--------------|--------------|--------------|--------------|--------------|
| Projected Population                                    | 14,863,500   | 15,047,800   | 15,229,900   | 15,409,700   | 15,586,600   | 15,760,900   | 15,932,400   | 16,101,200   | 16,267,600   | 16,431,700   | 16,592,900   | 16,751,400   |
| HEALTH FACILITY/YEAR                                    | 2019         | 2020         | 2021         | 2022         | 2023         | 2024         | 2025         | 2026         | 2027         | 2028         | 2029         | 2030         |
| Outpatient Puskesmas                                    | 327          | 319          | 312          | 305          | 298          | 292          | 286          | 280          | 275          | 270          | 265          | 261          |
| Inpatient Puskesmas                                     | 364          | 402          | 439          | 475          | 511          | 545          | 579          | 611          | 643          | 675          | 705          | 735          |
| Type D Hospital                                         | 51           | 58           | 63           | 68           | 72           | 76           | 79           | 82           | 84           | 87           | 89           | 91           |
| Type C Hospital                                         | 87           | 108          | 131          | 154          | 178          | 203          | 228          | 253          | 278          | 303          | 328          | 353          |
| Type B Hospital                                         | 16           | 20           | 23           | 28           | 33           | 39           | 45           | 51           | 59           | 67           | 75           | 84           |
| Type A Hospital                                         | 3            | 3            | 3            | 3            | 3            | 3            | 3            | 3            | 3            | 3            | 3            | 3            |
| <b>Total Health Facilities</b>                          | <b>848</b>   | <b>910</b>   | <b>972</b>   | <b>1033</b>  | <b>1095</b>  | <b>1157</b>  | <b>1219</b>  | <b>1280</b>  | <b>1342</b>  | <b>1404</b>  | <b>1466</b>  | <b>1527</b>  |
| <b>Overall Health facilities per 100,000 population</b> | <b>5.705</b> | <b>6.046</b> | <b>6.379</b> | <b>6.705</b> | <b>7.025</b> | <b>7.339</b> | <b>7.648</b> | <b>7.951</b> | <b>8.250</b> | <b>8.543</b> | <b>8.832</b> | <b>9.117</b> |
| <b>Primary care (Puskesmas) per 30,000 populati</b>     | <b>1.395</b> | <b>1.438</b> | <b>1.479</b> | <b>1.518</b> | <b>1.556</b> | <b>1.592</b> | <b>1.627</b> | <b>1.661</b> | <b>1.693</b> | <b>1.724</b> | <b>1.754</b> | <b>1.783</b> |
| <b>Secondary care per 100,000 population</b>            | <b>1.036</b> | <b>1.233</b> | <b>1.430</b> | <b>1.625</b> | <b>1.819</b> | <b>2.012</b> | <b>2.205</b> | <b>2.396</b> | <b>2.587</b> | <b>2.778</b> | <b>2.967</b> | <b>3.156</b> |
| Type D hospital per 100,000 population                  | 0.346        | 0.385        | 0.416        | 0.441        | 0.462        | 0.479        | 0.494        | 0.507        | 0.518        | 0.528        | 0.537        | 0.545        |
| Type C Hospital per 100,000 population                  | 0.582        | 0.719        | 0.859        | 1.002        | 1.145        | 1.288        | 1.430        | 1.570        | 1.708        | 1.844        | 1.978        | 2.110        |
| Type B hospital per 100,000 population                  | 0.108        | 0.130        | 0.154        | 0.182        | 0.212        | 0.245        | 0.281        | 0.320        | 0.361        | 0.406        | 0.452        | 0.502        |
| <b>Tertiary care per 100,000 population</b>             | <b>0.020</b> | <b>0.020</b> | <b>0.020</b> | <b>0.019</b> | <b>0.019</b> | <b>0.019</b> | <b>0.019</b> | <b>0.019</b> | <b>0.018</b> | <b>0.018</b> | <b>0.018</b> | <b>0.018</b> |

  

| REGION 3 - BALI AND THE NUSA TENGGARA ISLANDS |              |              |              |              |              |              |              |              |              |              |              |              |
|-----------------------------------------------|--------------|--------------|--------------|--------------|--------------|--------------|--------------|--------------|--------------|--------------|--------------|--------------|
| STAFF TYPE                                    | Year 2019    | Year 2020    | Year 2021    | Year 2022    | Year 2023    | Year 2024    | Year 2025    | Year 2026    | Year 2027    | Year 2028    | Year 2029    | Year 2030    |
| General Practitioner                          | 1976         | 2235         | 2500         | 2769         | 3044         | 3324         | 3608         | 3897         | 4189         | 4486         | 4787         | 5093         |
| Nurse                                         | 15999        | 18624        | 21380        | 24261        | 27264        | 30384        | 33618        | 36965        | 40422        | 43988        | 47660        | 51438        |
| Paediatrician                                 | 301          | 364          | 431          | 501          | 573          | 648          | 725          | 805          | 887          | 971          | 1058         | 1146         |
| Obstetrician and Gynaecologist                | 301          | 364          | 431          | 501          | 573          | 648          | 725          | 805          | 887          | 971          | 1058         | 1146         |
| Internist                                     | 301          | 364          | 431          | 501          | 573          | 648          | 725          | 805          | 887          | 971          | 1058         | 1146         |
| General Surgeon                               | 301          | 364          | 431          | 501          | 573          | 648          | 725          | 805          | 887          | 971          | 1058         | 1146         |
| Anesthesiologist                              | 201          | 240          | 280          | 321          | 365          | 409          | 456          | 504          | 553          | 605          | 657          | 712          |
| Radiologist                                   | 179          | 214          | 250          | 287          | 326          | 365          | 405          | 446          | 489          | 532          | 576          | 622          |
| Clinical Pathologist                          | 179          | 214          | 250          | 287          | 326          | 365          | 405          | 446          | 489          | 532          | 576          | 622          |
| Anatomical Pathologist                        | 160          | 192          | 224          | 256          | 290          | 323          | 357          | 392          | 427          | 462          | 498          | 535          |
| Surgical Oncologist                           | 22           | 26           | 29           | 34           | 39           | 45           | 51           | 57           | 65           | 73           | 81           | 90           |
| Medical Oncologist                            | 19           | 23           | 26           | 31           | 36           | 42           | 48           | 54           | 62           | 70           | 78           | 87           |
| Paediatric Medical Oncologist                 | 19           | 23           | 26           | 31           | 36           | 42           | 48           | 54           | 62           | 70           | 78           | 87           |
| Gynecologic Oncologist                        | 22           | 26           | 29           | 34           | 39           | 45           | 51           | 57           | 65           | 73           | 81           | 90           |
| ENT Oncologist                                | 19           | 23           | 26           | 31           | 36           | 42           | 48           | 54           | 62           | 70           | 78           | 87           |
| Urologic Oncologist                           | 19           | 23           | 26           | 31           | 36           | 42           | 48           | 54           | 62           | 70           | 78           | 87           |
| Pulmonologic Oncologist                       | 19           | 23           | 26           | 31           | 36           | 42           | 48           | 54           | 62           | 70           | 78           | 87           |
| Radiation Oncologist                          | 19           | 23           | 26           | 31           | 36           | 42           | 48           | 54           | 62           | 70           | 78           | 87           |
| Medical Physicist                             | 19           | 23           | 26           | 31           | 36           | 42           | 48           | 54           | 62           | 70           | 78           | 87           |
| Radiation Therapy Technologist                | 19           | 23           | 26           | 31           | 36           | 42           | 48           | 54           | 62           | 70           | 78           | 87           |
| <b>TOTAL</b>                                  | <b>20093</b> | <b>23407</b> | <b>26879</b> | <b>30502</b> | <b>34272</b> | <b>38183</b> | <b>42234</b> | <b>46421</b> | <b>50741</b> | <b>55193</b> | <b>59774</b> | <b>64483</b> |

## Appendix 7. Forecast of Healthcare Facilities and HRH-related Oncology in the Kalimantan Region

| REGION 4 - KALIMANTAN ISLAND                     |             |             |             |             |             |             |             |             |             |             |             |             |
|--------------------------------------------------|-------------|-------------|-------------|-------------|-------------|-------------|-------------|-------------|-------------|-------------|-------------|-------------|
| Projected Population                             | 16,491,700  | 16,769,700  | 17,042,800  | 17,311,000  | 17,573,800  | 17,831,100  | 18,082,600  | 18,328,700  | 18,570,200  | 18,806,500  | 19,037,900  | 19,264,000  |
| HEALTH FACILITY/YEAR                             | 2019        | 2020        | 2021        | 2022        | 2023        | 2024        | 2025        | 2026        | 2027        | 2028        | 2029        | 2030        |
| Outpatient Puskesmas                             | 392         | 367         | 345         | 324         | 305         | 288         | 272         | 258         | 245         | 233         | 223         | 213         |
| Inpatient Puskesmas                              | 533         | 612         | 688         | 760         | 830         | 896         | 960         | 1021        | 1080        | 1136        | 1191        | 1243        |
| Type D Hospital                                  | 53          | 64          | 72          | 80          | 86          | 92          | 97          | 101         | 106         | 109         | 113         | 117         |
| Type C Hospital                                  | 110         | 138         | 169         | 203         | 238         | 275         | 314         | 353         | 394         | 435         | 477         | 520         |
| Type B Hospital                                  | 22          | 25          | 27          | 31          | 34          | 38          | 43          | 48          | 53          | 59          | 66          | 73          |
| Type A Hospital                                  | 3           | 3           | 3           | 3           | 3           | 3           | 3           | 4           | 4           | 4           | 4           | 4           |
| <b>Total Health Facilities</b>                   | <b>1113</b> | <b>1209</b> | <b>1305</b> | <b>1401</b> | <b>1497</b> | <b>1593</b> | <b>1689</b> | <b>1785</b> | <b>1881</b> | <b>1977</b> | <b>2073</b> | <b>2169</b> |
| Overall Health facilities per 100,000 population | 6.749       | 7.209       | 7.657       | 8.093       | 8.518       | 8.934       | 9.340       | 9.739       | 10.129      | 10.512      | 10.889      | 11.259      |
| Primary care (Puskesmas) per 30,000 population   | 1.683       | 1.752       | 1.818       | 1.879       | 1.937       | 1.992       | 2.044       | 2.093       | 2.140       | 2.185       | 2.227       | 2.268       |
| Secondary care per 100,000 population            | 1.122       | 1.349       | 1.579       | 1.810       | 2.042       | 2.274       | 2.508       | 2.741       | 2.976       | 3.211       | 3.446       | 3.681       |
| Type D hospital per 100,000 population           | 0.319       | 0.379       | 0.425       | 0.461       | 0.490       | 0.515       | 0.535       | 0.553       | 0.568       | 0.582       | 0.594       | 0.606       |
| Type C Hospital per 100,000 population           | 0.668       | 0.824       | 0.993       | 1.172       | 1.356       | 1.544       | 1.735       | 1.927       | 2.120       | 2.313       | 2.506       | 2.698       |
| Type B hospital per 100,000 population           | 0.135       | 0.146       | 0.161       | 0.177       | 0.195       | 0.215       | 0.237       | 0.261       | 0.287       | 0.315       | 0.346       | 0.378       |
| Tertiary care per 100,000 population             | 0.018       | 0.020       | 0.019       | 0.019       | 0.019       | 0.019       | 0.019       | 0.019       | 0.019       | 0.019       | 0.019       | 0.019       |

| REGION 4 - KALIMANTAN ISLAND   |              |              |              |              |              |              |              |              |              |              |              |              |
|--------------------------------|--------------|--------------|--------------|--------------|--------------|--------------|--------------|--------------|--------------|--------------|--------------|--------------|
| STAFF TYPE                     | Year 2019    | Year 2020    | Year 2021    | Year 2022    | Year 2023    | Year 2024    | Year 2025    | Year 2026    | Year 2027    | Year 2028    | Year 2029    | Year 2030    |
| General Practitioner           | 2588         | 2960         | 3340         | 3728         | 4123         | 4524         | 4932         | 5346         | 5765         | 6190         | 6621         | 7056         |
| Nurse                          | 20540        | 23816        | 27271        | 30899        | 34687        | 38626        | 42709        | 46932        | 51290        | 55781        | 60403        | 65153        |
| Paediatrician                  | 374          | 451          | 534          | 622          | 714          | 810          | 910          | 1014         | 1121         | 1231         | 1345         | 1462         |
| Obstetrician and Gynaecologist | 374          | 451          | 534          | 622          | 714          | 810          | 910          | 1014         | 1121         | 1231         | 1345         | 1462         |
| Internist                      | 374          | 451          | 534          | 622          | 714          | 810          | 910          | 1014         | 1121         | 1231         | 1345         | 1462         |
| General Surgeon                | 374          | 451          | 534          | 622          | 714          | 810          | 910          | 1014         | 1121         | 1231         | 1345         | 1462         |
| Anesthesiologist               | 245          | 292          | 341          | 391          | 444          | 500          | 557          | 616          | 677          | 740          | 806          | 873          |
| Radiologist                    | 216          | 261          | 306          | 354          | 403          | 454          | 507          | 561          | 617          | 674          | 733          | 793          |
| Clinical Pathologist           | 216          | 261          | 306          | 354          | 403          | 454          | 507          | 561          | 617          | 674          | 733          | 793          |
| Anatomical Pathologist         | 191          | 233          | 276          | 320          | 366          | 412          | 460          | 510          | 560          | 611          | 663          | 717          |
| Surgical Oncologist            | 28           | 31           | 34           | 37           | 41           | 45           | 50           | 55           | 61           | 67           | 73           | 80           |
| Medical Oncologist             | 25           | 28           | 31           | 34           | 38           | 42           | 46           | 51           | 57           | 63           | 69           | 76           |
| Paediatric Medical Oncologist  | 25           | 28           | 31           | 34           | 38           | 42           | 46           | 51           | 57           | 63           | 69           | 76           |
| Gynecologic Oncologist         | 28           | 31           | 34           | 37           | 41           | 45           | 50           | 55           | 61           | 67           | 73           | 80           |
| ENT Oncologist                 | 25           | 28           | 31           | 34           | 38           | 42           | 46           | 51           | 57           | 63           | 69           | 76           |
| Urologic Oncologist            | 25           | 28           | 31           | 34           | 38           | 42           | 46           | 51           | 57           | 63           | 69           | 76           |
| Pulmonologic Oncologist        | 25           | 28           | 31           | 34           | 38           | 42           | 46           | 51           | 57           | 63           | 69           | 76           |
| Radiation Oncologist           | 25           | 28           | 31           | 34           | 38           | 42           | 46           | 51           | 57           | 63           | 69           | 76           |
| Medical Physicist              | 25           | 28           | 31           | 34           | 38           | 42           | 46           | 51           | 57           | 63           | 69           | 76           |
| Radiation Therapy Technologist | 25           | 28           | 31           | 34           | 38           | 42           | 46           | 51           | 57           | 63           | 69           | 76           |
| <b>TOTAL</b>                   | <b>25750</b> | <b>29910</b> | <b>34289</b> | <b>38879</b> | <b>43665</b> | <b>48635</b> | <b>53782</b> | <b>59101</b> | <b>64585</b> | <b>70232</b> | <b>76040</b> | <b>82004</b> |

## Appendix 8. Forecast of Healthcare Facilities and HRH-related Oncology in the Sulawesi Region

| REGION 5 - SULAWESI ISLAND                              |              |              |              |              |              |               |               |               |               |               |               |               |
|---------------------------------------------------------|--------------|--------------|--------------|--------------|--------------|---------------|---------------|---------------|---------------|---------------|---------------|---------------|
| Projected Population                                    | 19,699,800   | 19,934,000   | 20,163,100   | 20,386,500   | 20,603,900   | 20,815,000    | 21,019,800    | 21,218,300    | 21,411,200    | 21,598,100    | 21,779,100    | 21,953,500    |
| HEALTH FACILITY/YEAR                                    | 2019         | 2020         | 2021         | 2022         | 2023         | 2024          | 2025          | 2026          | 2027          | 2028          | 2029          | 2030          |
| Outpatient Puskesmas                                    | 680          | 668          | 657          | 646          | 635          | 625           | 615           | 606           | 597           | 588           | 580           | 572           |
| Inpatient Puskesmas                                     | 658          | 711          | 762          | 813          | 861          | 909           | 955           | 1000          | 1044          | 1086          | 1128          | 1168          |
| Type D Hospital                                         | 75           | 87           | 96           | 102          | 107          | 111           | 115           | 118           | 121           | 123           | 126           | 128           |
| Type C Hospital                                         | 144          | 188          | 235          | 285          | 337          | 390           | 444           | 499           | 554           | 609           | 665           | 721           |
| Type B Hospital                                         | 36           | 39           | 43           | 47           | 52           | 57            | 63            | 70            | 77            | 85            | 94            | 104           |
| Type A Hospital                                         | 3            | 3            | 3            | 3            | 3            | 3             | 4             | 4             | 4             | 4             | 4             | 4             |
| <b>Total Health Facilities</b>                          | <b>1593</b>  | <b>1693</b>  | <b>1793</b>  | <b>1893</b>  | <b>1993</b>  | <b>2093</b>   | <b>2192</b>   | <b>2292</b>   | <b>2392</b>   | <b>2492</b>   | <b>2592</b>   | <b>2692</b>   |
| <b>Overall Health facilities per 100,000 population</b> | <b>8.086</b> | <b>8.491</b> | <b>8.890</b> | <b>9.283</b> | <b>9.671</b> | <b>10.053</b> | <b>10.431</b> | <b>10.804</b> | <b>11.174</b> | <b>11.540</b> | <b>11.903</b> | <b>12.264</b> |
| <b>Primary care (Puskesmas) per 30,000 populati</b>     | <b>2.038</b> | <b>2.075</b> | <b>2.112</b> | <b>2.146</b> | <b>2.179</b> | <b>2.211</b>  | <b>2.241</b>  | <b>2.270</b>  | <b>2.299</b>  | <b>2.326</b>  | <b>2.352</b>  | <b>2.378</b>  |
| <b>Secondary care per 100,000 population</b>            | <b>1.294</b> | <b>1.573</b> | <b>1.852</b> | <b>2.130</b> | <b>2.408</b> | <b>2.684</b>  | <b>2.961</b>  | <b>3.236</b>  | <b>3.512</b>  | <b>3.787</b>  | <b>4.063</b>  | <b>4.338</b>  |
| Type D hospital per 100,000 population                  | 0.378        | 0.436        | 0.474        | 0.501        | 0.521        | 0.535         | 0.547         | 0.556         | 0.564         | 0.571         | 0.578         | 0.584         |
| Type C Hospital per 100,000 population                  | 0.733        | 0.942        | 1.166        | 1.399        | 1.636        | 1.874         | 2.113         | 2.350         | 2.586         | 2.820         | 3.053         | 3.283         |
| Type B hospital per 100,000 population                  | 0.183        | 0.195        | 0.211        | 0.230        | 0.251        | 0.275         | 0.301         | 0.330         | 0.362         | 0.396         | 0.432         | 0.471         |
| <b>Tertiary care per 100,000 population</b>             | <b>0.016</b> | <b>0.017</b> | <b>0.017</b> | <b>0.017</b> | <b>0.017</b> | <b>0.017</b>  | <b>0.017</b>  | <b>0.017</b>  | <b>0.017</b>  | <b>0.017</b>  | <b>0.017</b>  | <b>0.017</b>  |

  

| REGION 5 - SULAWESI ISLAND     |              |              |              |              |              |              |              |              |              |              |               |               |
|--------------------------------|--------------|--------------|--------------|--------------|--------------|--------------|--------------|--------------|--------------|--------------|---------------|---------------|
| STAFF TYPE                     | Year 2019    | Year 2020    | Year 2021    | Year 2022    | Year 2023    | Year 2024    | Year 2025    | Year 2026    | Year 2027    | Year 2028    | Year 2029     | Year 2030     |
| General Practitioner           | 3558         | 3994         | 4442         | 4901         | 5368         | 5843         | 6324         | 6813         | 7307         | 7807         | 8313          | 8824          |
| Nurse                          | 28772        | 33108        | 37675        | 42448        | 47403        | 52524        | 57800        | 63226        | 68795        | 74505        | 80353         | 86338         |
| Paediatrician                  | 520          | 632          | 750          | 874          | 1002         | 1134         | 1270         | 1410         | 1552         | 1698         | 1847          | 1998          |
| Obstetrician and Gynaecologist | 520          | 632          | 750          | 874          | 1002         | 1134         | 1270         | 1410         | 1552         | 1698         | 1847          | 1998          |
| Internist                      | 520          | 632          | 750          | 874          | 1002         | 1134         | 1270         | 1410         | 1552         | 1698         | 1847          | 1998          |
| General Surgeon                | 520          | 632          | 750          | 874          | 1002         | 1134         | 1270         | 1410         | 1552         | 1698         | 1847          | 1998          |
| Anesthesiologist               | 342          | 408          | 476          | 545          | 617          | 691          | 766          | 844          | 925          | 1007         | 1091          | 1178          |
| Radiologist                    | 300          | 363          | 426          | 491          | 558          | 626          | 696          | 767          | 840          | 914          | 990           | 1067          |
| Clinical Pathologist           | 300          | 363          | 426          | 491          | 558          | 626          | 696          | 767          | 840          | 914          | 990           | 1067          |
| Anatomical Pathologist         | 261          | 320          | 380          | 441          | 503          | 566          | 629          | 694          | 759          | 825          | 892           | 960           |
| Surgical Oncologist            | 42           | 46           | 49           | 54           | 59           | 64           | 70           | 77           | 85           | 93           | 101           | 111           |
| Medical Oncologist             | 39           | 42           | 46           | 50           | 55           | 61           | 67           | 74           | 81           | 89           | 98            | 107           |
| Paediatric Medical Oncologist  | 39           | 42           | 46           | 50           | 55           | 61           | 67           | 74           | 81           | 89           | 98            | 107           |
| Gynecologic Oncologist         | 42           | 46           | 49           | 54           | 59           | 64           | 70           | 77           | 85           | 93           | 101           | 111           |
| ENT Oncologist                 | 39           | 42           | 46           | 50           | 55           | 61           | 67           | 74           | 81           | 89           | 98            | 107           |
| Urologic Oncologist            | 39           | 42           | 46           | 50           | 55           | 61           | 67           | 74           | 81           | 89           | 98            | 107           |
| Pulmonologic Oncologist        | 39           | 42           | 46           | 50           | 55           | 61           | 67           | 74           | 81           | 89           | 98            | 107           |
| Radiation Oncologist           | 39           | 42           | 46           | 50           | 55           | 61           | 67           | 74           | 81           | 89           | 98            | 107           |
| Medical Physicist              | 39           | 42           | 46           | 50           | 55           | 61           | 67           | 74           | 81           | 89           | 98            | 107           |
| Radiation Therapy Technologist | 39           | 42           | 46           | 50           | 55           | 61           | 67           | 74           | 81           | 89           | 98            | 107           |
| <b>TOTAL</b>                   | <b>36009</b> | <b>41512</b> | <b>47294</b> | <b>53324</b> | <b>59575</b> | <b>66027</b> | <b>72670</b> | <b>79493</b> | <b>86492</b> | <b>93662</b> | <b>101000</b> | <b>108505</b> |



## Appendix 9. Forecast of Healthcare Facilities and HRH-related Oncology in the Maluku Region

| REGION 6 - MALUKU ISLAND                         |            |            |            |            |            |            |            |            |            |            |            |            |
|--------------------------------------------------|------------|------------|------------|------------|------------|------------|------------|------------|------------|------------|------------|------------|
| Projected Population                             | 3,058,700  | 3,110,700  | 3,162,300  | 3,213,500  | 3,264,200  | 3,314,200  | 3,363,700  | 3,412,600  | 3,461,100  | 3,509,200  | 3,556,600  | 3,603,600  |
| HEALTH FACILITY/YEAR                             | 2019       | 2020       | 2021       | 2022       | 2023       | 2024       | 2025       | 2026       | 2027       | 2028       | 2029       | 2030       |
| Outpatient Puskesmas                             | 122        | 111        | 102        | 94         | 87         | 82         | 77         | 73         | 69         | 66         | 64         | 62         |
| Inpatient Puskesmas                              | 234        | 284        | 330        | 373        | 414        | 453        | 489        | 524        | 557        | 588        | 618        | 646        |
| Type D Hospital                                  | 33         | 43         | 54         | 66         | 79         | 93         | 107        | 122        | 138        | 154        | 170        | 187        |
| Type C Hospital                                  | 13         | 15         | 18         | 21         | 24         | 28         | 32         | 37         | 43         | 48         | 55         | 61         |
| Type B Hospital                                  | 5          | 6          | 7          | 7          | 8          | 9          | 10         | 11         | 12         | 14         | 15         | 17         |
| Type A Hospital                                  | 0          | 0          | 0          | 0          | 0          | 0          | 0          | 0          | 0          | 0          | 0          | 0          |
| <b>Total Health Facilities</b>                   | <b>407</b> | <b>459</b> | <b>510</b> | <b>562</b> | <b>613</b> | <b>665</b> | <b>716</b> | <b>768</b> | <b>819</b> | <b>871</b> | <b>922</b> | <b>974</b> |
| Overall Health facilities per 100,000 population | 13.306     | 14.739     | 16.128     | 17.473     | 18.779     | 20.050     | 21.286     | 22.490     | 23.663     | 24.806     | 25.924     | 27.015     |
| Primary care (Puskesmas) per 30,000 populati     | 3.492      | 3.807      | 4.097      | 4.364      | 4.611      | 4.840      | 5.051      | 5.247      | 5.428      | 5.596      | 5.752      | 5.896      |
| Secondary care per 100,000 population            | 1.667      | 2.050      | 2.471      | 2.926      | 3.409      | 3.918      | 4.450      | 5.001      | 5.570      | 6.154      | 6.751      | 7.361      |
| Type D hospital per 100,000 population           | 1.066      | 1.368      | 1.697      | 2.048      | 2.416      | 2.797      | 3.187      | 3.583      | 3.982      | 4.383      | 4.784      | 5.182      |
| Type C Hospital per 100,000 population           | 0.427      | 0.492      | 0.566      | 0.650      | 0.744      | 0.849      | 0.965      | 1.091      | 1.229      | 1.377      | 1.535      | 1.703      |
| Type B hospital per 100,000 population           | 0.173      | 0.190      | 0.208      | 0.227      | 0.249      | 0.272      | 0.298      | 0.327      | 0.359      | 0.394      | 0.432      | 0.475      |
| Tertiary care per 100,000 population             | 0.000      | 0.000      | 0.000      | 0.000      | 0.000      | 0.000      | 0.000      | 0.000      | 0.000      | 0.000      | 0.000      | 0.000      |

| REGION 6 - MALUKU ISLAND       |             |             |             |              |              |              |              |              |              |              |              |              |
|--------------------------------|-------------|-------------|-------------|--------------|--------------|--------------|--------------|--------------|--------------|--------------|--------------|--------------|
| STAFF TYPE                     | Year 2019   | Year 2020   | Year 2021   | Year 2022    | Year 2023    | Year 2024    | Year 2025    | Year 2026    | Year 2027    | Year 2028    | Year 2029    | Year 2030    |
| General Practitioner           | 852         | 1000        | 1150        | 1303         | 1458         | 1617         | 1780         | 1945         | 2114         | 2286         | 2462         | 2641         |
| Nurse                          | 5495        | 6436        | 7434        | 8490         | 9606         | 10781        | 12018        | 13319        | 14683        | 16114        | 17611        | 19177        |
| Paediatrician                  | 80          | 97          | 116         | 137          | 160          | 185          | 212          | 241          | 273          | 306          | 341          | 378          |
| Obstetrician and Gynaecologist | 80          | 97          | 116         | 137          | 160          | 185          | 212          | 241          | 273          | 306          | 341          | 378          |
| Internist                      | 80          | 97          | 116         | 137          | 160          | 185          | 212          | 241          | 273          | 306          | 341          | 378          |
| General Surgeon                | 80          | 97          | 116         | 137          | 160          | 185          | 212          | 241          | 273          | 306          | 341          | 378          |
| Anesthesiologist               | 62          | 76          | 91          | 109          | 128          | 148          | 170          | 193          | 218          | 244          | 271          | 299          |
| Radiologist                    | 56          | 70          | 85          | 101          | 119          | 139          | 160          | 182          | 205          | 230          | 255          | 282          |
| Clinical Pathologist           | 56          | 70          | 85          | 101          | 119          | 139          | 160          | 182          | 205          | 230          | 255          | 282          |
| Anatomical Pathologist         | 51          | 64          | 78          | 94           | 111          | 130          | 150          | 171          | 193          | 216          | 240          | 265          |
| Surgical Oncologist            | 5           | 6           | 7           | 7            | 8            | 9            | 10           | 11           | 12           | 14           | 15           | 17           |
| Medical Oncologist             | 5           | 6           | 7           | 7            | 8            | 9            | 10           | 11           | 12           | 14           | 15           | 17           |
| Paediatric Medical Oncologist  | 5           | 6           | 7           | 7            | 8            | 9            | 10           | 11           | 12           | 14           | 15           | 17           |
| Gynecologic Oncologist         | 5           | 6           | 7           | 7            | 8            | 9            | 10           | 11           | 12           | 14           | 15           | 17           |
| ENT Oncologist                 | 5           | 6           | 7           | 7            | 8            | 9            | 10           | 11           | 12           | 14           | 15           | 17           |
| Urologic Oncologist            | 5           | 6           | 7           | 7            | 8            | 9            | 10           | 11           | 12           | 14           | 15           | 17           |
| Pulmonologic Oncologist        | 5           | 6           | 7           | 7            | 8            | 9            | 10           | 11           | 12           | 14           | 15           | 17           |
| Radiation Oncologist           | 5           | 6           | 7           | 7            | 8            | 9            | 10           | 11           | 12           | 14           | 15           | 17           |
| Medical Physicist              | 5           | 6           | 7           | 7            | 8            | 9            | 10           | 11           | 12           | 14           | 15           | 17           |
| Radiation Therapy Technologist | 5           | 6           | 7           | 7            | 8            | 9            | 10           | 11           | 12           | 14           | 15           | 17           |
| <b>TOTAL</b>                   | <b>6946</b> | <b>8161</b> | <b>9452</b> | <b>10819</b> | <b>12263</b> | <b>13785</b> | <b>15386</b> | <b>17068</b> | <b>18832</b> | <b>20680</b> | <b>22612</b> | <b>24630</b> |

## Appendix 10. Forecast of Healthcare Facilities and HRH-related Oncology in the Papua Region

| REGION 7 - PAPUA ISLAND                          |            |            |            |            |             |             |             |             |             |             |             |             |  |
|--------------------------------------------------|------------|------------|------------|------------|-------------|-------------|-------------|-------------|-------------|-------------|-------------|-------------|--|
| Projected Population                             | 4,338,900  | 4,407,200  | 4,494,800  | 4,571,400  | 4,646,800   | 4,721,000   | 4,793,900   | 4,865,500   | 4,936,000   | 5,005,200   | 5,073,100   | 5,139,500   |  |
| HEALTH FACILITY/YEAR                             | 2019       | 2020       | 2021       | 2022       | 2023        | 2024        | 2025        | 2026        | 2027        | 2028        | 2029        | 2030        |  |
| Outpatient Puskesmas                             | 159        | 140        | 125        | 112        | 102         | 93          | 86          | 80          | 75          | 70          | 67          | 64          |  |
| Inpatient Puskesmas                              | 420        | 504        | 582        | 655        | 722         | 785         | 843         | 898         | 950         | 999         | 1045        | 1089        |  |
| Type D Hospital                                  | 38         | 59         | 81         | 105        | 130         | 155         | 180         | 206         | 231         | 257         | 282         | 307         |  |
| Type C Hospital                                  | 23         | 28         | 34         | 43         | 54          | 66          | 81          | 98          | 118         | 139         | 163         | 189         |  |
| Type B Hospital                                  | 2          | 2          | 2          | 2          | 2           | 2           | 2           | 2           | 2           | 2           | 2           | 2           |  |
| Type A Hospital                                  | 0          | 0          | 0          | 0          | 0           | 0           | 0           | 0           | 0           | 0           | 0           | 0           |  |
| <b>Total Health Facilities</b>                   | <b>642</b> | <b>734</b> | <b>826</b> | <b>917</b> | <b>1009</b> | <b>1101</b> | <b>1193</b> | <b>1284</b> | <b>1376</b> | <b>1468</b> | <b>1560</b> | <b>1651</b> |  |
| Overall Health facilities per 100,000 population | 14.796     | 16.649     | 18.366     | 20.065     | 21.714      | 23.316      | 24.875      | 26.395      | 27.877      | 29.325      | 30.741      | 32.129      |  |
| Primary care (Puskesmas) per 30,000 populati     | 4.003      | 4.390      | 4.722      | 5.033      | 5.317       | 5.576       | 5.812       | 6.029       | 6.227       | 6.410       | 6.577       | 6.731       |  |
| Secondary care per 100,000 population            | 1.452      | 2.015      | 2.625      | 3.287      | 3.991       | 4.731       | 5.501       | 6.298       | 7.119       | 7.959       | 8.818       | 9.693       |  |
| Type D hospital per 100,000 population           | 0.870      | 1.334      | 1.810      | 2.299      | 2.790       | 3.277       | 3.758       | 4.228       | 4.685       | 5.128       | 5.555       | 5.966       |  |
| Type C Hospital per 100,000 population           | 0.528      | 0.629      | 0.763      | 0.938      | 1.152       | 1.404       | 1.695       | 2.023       | 2.387       | 2.785       | 3.218       | 3.682       |  |
| Type B hospital per 100,000 population           | 0.053      | 0.053      | 0.052      | 0.051      | 0.050       | 0.049       | 0.048       | 0.048       | 0.047       | 0.046       | 0.046       | 0.045       |  |
| Tertiary care per 100,000 population             | 0.000      | 0.000      | 0.000      | 0.000      | 0.000       | 0.000       | 0.000       | 0.000       | 0.000       | 0.000       | 0.000       | 0.000       |  |

| REGION 7 - PAPUA ISLAND        |             |              |              |              |              |              |              |              |              |              |              |              |
|--------------------------------|-------------|--------------|--------------|--------------|--------------|--------------|--------------|--------------|--------------|--------------|--------------|--------------|
| STAFF TYPE                     | Year 2019   | Year 2020    | Year 2021    | Year 2022    | Year 2023    | Year 2024    | Year 2025    | Year 2026    | Year 2027    | Year 2028    | Year 2029    | Year 2030    |
| General Practitioner           | 1311        | 1574         | 1844         | 2122         | 2408         | 2702         | 3003         | 3313         | 3630         | 3955         | 4287         | 4627         |
| Nurse                          | 7400        | 8997         | 10732        | 12603        | 14610        | 16752        | 19025        | 21429        | 23961        | 26617        | 29396        | 32293        |
| Paediatrician                  | 93          | 123          | 159          | 200          | 246          | 297          | 352          | 412          | 476          | 545          | 618          | 694          |
| Obstetrician and Gynaecologist | 93          | 123          | 159          | 200          | 246          | 297          | 352          | 412          | 476          | 545          | 618          | 694          |
| Internist                      | 93          | 123          | 159          | 200          | 246          | 297          | 352          | 412          | 476          | 545          | 618          | 694          |
| General Surgeon                | 93          | 123          | 159          | 200          | 246          | 297          | 352          | 412          | 476          | 545          | 618          | 694          |
| Anesthesiologist               | 68          | 93           | 123          | 155          | 190          | 228          | 268          | 311          | 356          | 403          | 452          | 503          |
| Radiologist                    | 65          | 91           | 120          | 153          | 188          | 226          | 266          | 309          | 354          | 401          | 450          | 500          |
| Clinical Pathologist           | 65          | 91           | 120          | 153          | 188          | 226          | 266          | 309          | 354          | 401          | 450          | 500          |
| Anatomical Pathologist         | 63          | 89           | 118          | 150          | 185          | 223          | 264          | 306          | 351          | 398          | 447          | 498          |
| Surgical Oncologist            | 2           | 2            | 2            | 2            | 2            | 2            | 2            | 2            | 2            | 2            | 2            | 2            |
| Medical Oncologist             | 2           | 2            | 2            | 2            | 2            | 2            | 2            | 2            | 2            | 2            | 2            | 2            |
| Paediatric Medical Oncologist  | 2           | 2            | 2            | 2            | 2            | 2            | 2            | 2            | 2            | 2            | 2            | 2            |
| Gynecologic Oncologist         | 2           | 2            | 2            | 2            | 2            | 2            | 2            | 2            | 2            | 2            | 2            | 2            |
| ENT Oncologist                 | 2           | 2            | 2            | 2            | 2            | 2            | 2            | 2            | 2            | 2            | 2            | 2            |
| Urologic Oncologist            | 2           | 2            | 2            | 2            | 2            | 2            | 2            | 2            | 2            | 2            | 2            | 2            |
| Pulmonologic Oncologist        | 2           | 2            | 2            | 2            | 2            | 2            | 2            | 2            | 2            | 2            | 2            | 2            |
| Radiation Oncologist           | 2           | 2            | 2            | 2            | 2            | 2            | 2            | 2            | 2            | 2            | 2            | 2            |
| Medical Physicist              | 2           | 2            | 2            | 2            | 2            | 2            | 2            | 2            | 2            | 2            | 2            | 2            |
| Radiation Therapy Technologist | 2           | 2            | 2            | 2            | 2            | 2            | 2            | 2            | 2            | 2            | 2            | 2            |
| <b>TOTAL</b>                   | <b>9366</b> | <b>11453</b> | <b>13717</b> | <b>16159</b> | <b>18776</b> | <b>21565</b> | <b>24524</b> | <b>27647</b> | <b>30933</b> | <b>34377</b> | <b>37975</b> | <b>41722</b> |

## Appendix 11. Annual Incremental Costs Estimation 2020 - 2030

| STAFF TYPE                     | Current Expenditure (2019) | Expenditure for Projected HRH Requirement (2019) | Expenditure Gap (2019) | 2020           | 2021             | 2022             | 2023             | 2024             | 2025             | 2026             | 2027             | 2028             | 2029             | 2030             |
|--------------------------------|----------------------------|--------------------------------------------------|------------------------|----------------|------------------|------------------|------------------|------------------|------------------|------------------|------------------|------------------|------------------|------------------|
| General Practitioner           | £549.03                    | £406.74                                          | £142.30                | £113.46        | £134.65          | £159.10          | £187.19          | £219.44          | £256.43          | £298.79          | £347.27          | £402.69          | £465.96          | £538.13          |
| Nurse                          | £1,521.56                  | £1,369.48                                        | £152.08                | £396.91        | £482.72          | £583.48          | £700.83          | £837.31          | £995.77          | £1,179.45        | £1,392.01        | £1,637.60        | £1,920.91        | £2,247.26        |
| Paediatrician                  | £65.95                     | £114.55                                          | £48.60                 | £38.05         | £47.06           | £57.55           | £69.72           | £83.85           | £100.23          | £119.17          | £141.06          | £166.31          | £195.38          | £228.82          |
| Obstetrician and gynaecologist | £148.95                    | £217.65                                          | £68.69                 | £72.29         | £89.42           | £109.34          | £132.47          | £159.32          | £190.43          | £226.43          | £268.01          | £315.98          | £371.22          | £434.76          |
| Internist                      | £82.35                     | £114.55                                          | £32.20                 | £38.05         | £47.06           | £57.55           | £69.72           | £83.85           | £100.23          | £119.17          | £141.06          | £166.31          | £195.38          | £228.82          |
| General Surgeon                | £88.36                     | £217.65                                          | £129.29                | £72.29         | £89.42           | £109.34          | £132.47          | £159.32          | £190.43          | £226.43          | £268.01          | £315.98          | £371.22          | £434.76          |
| Anesthesiologist               | £91.10                     | £165.88                                          | £74.78                 | £53.64         | £64.91           | £78.40           | £94.18           | £112.58          | £134.00          | £158.87          | £187.69          | £221.02          | £259.51          | £303.88          |
| Radiologist                    | £47.21                     | £111.51                                          | £64.29                 | £37.78         | £45.73           | £55.11           | £66.01           | £78.65           | £93.29           | £110.21          | £129.72          | £152.18          | £178.01          | £207.66          |
| Clinical Pathologist           | £30.77                     | £86.97                                           | £56.20                 | £29.47         | £35.67           | £42.98           | £51.49           | £61.35           | £72.77           | £85.96           | £101.18          | £118.70          | £138.85          | £161.98          |
| Anatomical Pathologist         | £11.90                     | £74.41                                           | £62.50                 | £26.52         | £32.02           | £38.46           | £45.88           | £54.44           | £64.27           | £75.56           | £88.49           | £103.30          | £120.22          | £139.55          |
| Surgical Oncologist            | £6.86                      | £18.81                                           | £11.96                 | £4.29          | £5.18            | £6.39            | £7.87            | £9.67            | £11.85           | £14.47           | £17.59           | £21.31           | £25.72           | £30.93           |
| Medical Oncologist             | £1.04                      | £5.32                                            | £4.28                  | £1.25          | £1.54            | £1.92            | £2.37            | £2.92            | £3.60            | £4.40            | £5.37            | £6.52            | £7.88            | £9.49            |
| Paediatric Medical Oncologist  | £1.19                      | £11.76                                           | £10.58                 | £2.76          | £3.42            | £4.24            | £5.24            | £6.47            | £7.95            | £9.74            | £11.87           | £14.41           | £17.43           | £20.99           |
| Gynecologic Oncologist         | £3.85                      | £20.62                                           | £16.77                 | £4.71          | £5.68            | £7.00            | £8.63            | £10.60           | £12.99           | £15.86           | £19.29           | £23.36           | £28.20           | £33.91           |
| ENT Oncologist                 | £1.69                      | £18.69                                           | £17.00                 | £4.38          | £5.43            | £6.73            | £8.33            | £10.28           | £12.64           | £15.47           | £18.87           | £22.90           | £27.70           | £33.36           |
| Urologic Oncologist            | £0.48                      | £18.37                                           | £17.89                 | £4.31          | £5.34            | £6.62            | £8.19            | £10.10           | £12.42           | £15.21           | £18.54           | £22.51           | £27.22           | £32.78           |
| Pulmonary Oncologist           | £0.86                      | £14.18                                           | £13.32                 | £3.32          | £4.12            | £5.11            | £6.32            | £7.80            | £9.59            | £11.74           | £14.31           | £17.38           | £21.01           | £25.31           |
| Radiation Oncologist           | £5.35                      | £27.07                                           | £21.73                 | £6.35          | £7.86            | £9.75            | £12.07           | £14.89           | £18.31           | £22.41           | £27.32           | £33.17           | £40.11           | £48.31           |
| Medical Physicist              | £3.29                      | £3.71                                            | £0.41                  | £0.87          | £1.08            | £1.33            | £1.65            | £2.04            | £2.51            | £3.07            | £3.74            | £4.54            | £5.49            | £6.61            |
| Radiation Therapy Technologist | £1.86                      | £3.05                                            | £1.19                  | £0.71          | £0.88            | £1.10            | £1.36            | £1.68            | £2.06            | £2.52            | £3.07            | £3.73            | £4.51            | £5.43            |
| <b>TOTAL</b>                   | <b>£2,663.66</b>           | <b>£3,020.95</b>                                 | <b>£357.29</b>         | <b>£911.41</b> | <b>£1,109.21</b> | <b>£1,341.47</b> | <b>£1,612.00</b> | <b>£1,926.58</b> | <b>£2,291.75</b> | <b>£2,714.93</b> | <b>£3,204.48</b> | <b>£3,769.90</b> | <b>£4,421.93</b> | <b>£5,172.72</b> |
